## **The effective population size and mutation rate of influenza A virus in acutely infected individuals**

Running Title: Within-host model of influenza

John T. McCrone <sup>1†</sup>, Robert J. Woods <sup>2</sup>, Arnold S. Monto <sup>3</sup>, Emily T. Martin <sup>3</sup>, and Adam S. Lauring <sup>1,2\*</sup>

<sup>1</sup> Department of Microbiology and Immunology, University of Michigan, Ann Arbor, MI 48109

<sup>2</sup> Division of Infectious Diseases, Department of Internal Medicine, University of Michigan, Ann Arbor, MI 48109

<sup>3</sup> Department of Epidemiology, University of Michigan, Ann Arbor, MI 48109

† Present address

Institute of Evolutionary Biology, University of Edinburgh, Edinburgh EH9; 3FL, UK.

\* Corresponding author

Adam S. Lauring

1150 W. Medical Center Dr.

MSRB1 Room 5510B

Ann Arbor, MI 48109-5680

(734) 764-7731

[alauring@med.umich.edu](mailto:alauring@med.umich.edu)

Key Words – influenza virus, transmission, diversity, evolution

## 1 **Abstract**

2 The global evolutionary dynamics of influenza viruses ultimately derive from processes that take  
3 place within and between infected individuals. Recent work suggests that within-host  
4 populations are dynamic, but an *in vivo* estimate of mutation rate and population size in  
5 naturally infected individuals remains elusive. Here we model the within-host dynamics of  
6 influenza A viruses using high depth of coverage sequence data from 200 acute infections in an  
7 outpatient, community setting. Using a Wright-Fisher model, we estimate a within-host effective  
8 population size of 32-72 and an *in vivo* mutation rate of  $3.4 \times 10^{-6}$  per nucleotide per generation.

9

## 10 **Introduction**

11 The rapid evolution of influenza viruses places demographic processes such as population  
12 growth, transmission, and epidemiological spread on a similar time scale as the accumulation of  
13 genetic substitutions. This similarity of scale makes it possible to infer demographic processes  
14 from genetic sequence data using phylodynamic methods (Lemey et al. 2009; Bedford et al.  
15 2014; Bedford et al. 2015). Investigations of the global dynamics of influenza have been  
16 successful, in part, because the complexities of within- and between-host processes can be  
17 collapsed into a limited number of parameters in the coalescent or birth-death process when  
18 averaged over large spatial and temporal scales. However, it becomes increasingly important to  
19 disentangle these processes to address more granular questions; for example, the transmission  
20 of viruses at local scales or selective pressures imposed by vaccines, antivirals, or novel hosts.

21

22 Phylogenetic approaches that separate within-host processes from those acting at  
23 epidemiological scales rely on simple population genetic models to capture the complex  
24 dynamics that occur within infected individuals (Didelot et al. 2014; Hall et al. 2015; Didelot et al.  
25 2017; De Maio et al. 2018). However, the accuracy of these models depends on reliable  
26 estimates of the within-host effective population size ( $N_e$ ), which in the case of influenza virus,

27 has proven difficult due to inherent challenges in collecting longitudinal samples from  
28 representative infections. Here, we take advantage of a large, well-studied, community cohort  
29 with robust deep sequencing data, from which two important results have emerged (McCrone et  
30 al. 2018). First, within-host selection for novel antigenic variants is weak, and second,  
31 transmission between hosts imposes a significant bottleneck on the viral population. We  
32 leverage these findings to fit a Wright-Fisher model to capture the dynamics of within-host  
33 populations. This model provides consistent and robust estimates of the within-host  $N_e$  and  
34 mutation rate of influenza A virus (IAV) when applied to cross-sectional and longitudinal  
35 samples. These findings provide an important baseline for defining processes related to the  
36 local dynamics of IAV, and of RNA viruses in general.

37

## 38 **Results**

39 We recently performed high depth of coverage sequencing of 249 IAV populations recovered  
40 from 200 individuals enrolled in the Household Influenza Vaccine Effectiveness (HIVE) study  
41 (McCrone et al. 2018). This large number of samples collected within a prospective community-  
42 based cohort is a rich dataset for exploring influenza virus evolution over the course of a natural  
43 infection. In this and other works, we have documented our sensitivity and specificity for  
44 detection of intrahost single nucleotide variants (iSNV) and our error in allele frequency  
45 measurement (McCrone and Luring 2016; Debbink et al. 2017; McCrone et al. 2018). Our  
46 dataset also includes 49 serially sampled individuals, who provided a self-collected specimen at  
47 the time of symptom onset and a clinic-collected specimen 0–7 days later. This affords an  
48 opportunity to explore changes in viral populations in naturally infected individuals over a short  
49 time scale.

50

51 We applied a continuous diffusion approximation of the Wright-Fisher model to define the within-  
52 host accumulation of mutations using 196 cross-sectional samples, collected 1-7 days following

53 the onset of symptoms (Rouzine et al. 2001). Because we have previously estimated an  
54 effective transmission bottleneck of 1-2 genetically distinct variants, we made the simplifying  
55 assumption that each infection was clonal and modeled the accumulation of diversity until the  
56 time of sampling as a neutral process. Maximum likelihood optimization of this model estimated  
57 an *in vivo* mutation rate of  $3.4 \times 10^{-6}$  (95% CI 3.1-3.7 $\times 10^{-6}$ ) mutations per nucleotide per  
58 generation (6 hours) and a within-host  $N_e$  of 36 (95% CI 31-41, Figure 1). We have recently  
59 estimated that the majority of mutations in IAV are detrimental and therefore unlikely to be  
60 observed at detectable frequencies (Visher et al. 2016). As only ~10% of mutations in influenza  
61 A virus are neutral, we propose that the true *in vivo* mutation rate is approximately ten-fold  
62 higher than our estimated rate, which does not account for purifying selection. This results in an  
63 *in vivo* mutation rate of approximately  $3.4 \times 10^{-5}$  substitutions per nucleotide replicated per  
64 generation, which is within the range of estimates for IAV's biochemical mutation rate in  
65 epithelial cells (Sanjuán et al. 2010).

66  
67 To determine the robustness of our  $N_e$  estimate, we fit this same model to changes in allele  
68 frequencies observed in a subset of paired longitudinal samples. We restricted this analysis to  
69 alleles observed at the first time point in samples taken at least 1 day apart (63 iSNV in 29  
70 sample pairs). There was very little change in iSNV frequency in populations sampled twice on  
71 the same day ( $R^2 = 0.986$ , Figure 2, Supplement 1A of (McCrone et al. 2018)). The  
72 concordance of same-day samples suggests that our sampling procedure and frequency  
73 measurements are reproducible. Maximum likelihood optimization of this model revealed a  
74 within-host  $N_e$  of 34 (95% CI 25-46, Table 1), very similar to that observed in the cross-sectional  
75 data above. Comparable estimates were obtained when synonymous and nonsynonymous  
76 mutations were fit separately (Table 1). As there is some uncertainty in the within-host  
77 generation time (Geoghegan et al. 2016), we also estimated the  $N_e$  based on a 12 hour  
78 generation. As expected, increasing the generation time results in a smaller  $N_e$ .

79

80 The Wright-Fisher model assumes that each allele in a population is independent. This  
81 assumption would be violated if there were multiple iSNV per genomic segment or varying  
82 linkage of iSNV across segments due to reassortment. However, heterotypic reassortment is  
83 quite rare within hosts (Sobel Leonard et al. 2017), and the per-sample diversity in our dataset  
84 was sufficiently low that nearly all segments had either 0 or 1 iSNV. To ensure that our results  
85 were robust to the assumption of independent allele frequencies, we fit the above model 500  
86 times, each time randomly subsetting our data such that only one iSNV per individual was  
87 included. In practice, this approach also tested the sensitivity of our estimates to individual allele  
88 trajectories. Under these conditions, we found a median  $N_e$  of 42 (IQR 37-52, Figure 1B). Thus,  
89 in the initial analysis, non-independence among iSNV within the same host may have caused a  
90 slight bias due to a few hosts with extreme frequency changes.

91

92 The estimates above include the probability that undetected variants are present but missed  
93 due to imperfect sensitivity (see Methods and (McCrone and Lauring 2016)); however, they do  
94 not account for uncertainty in the frequency measurements, which if large, would bias the  $N_e$   
95 estimate toward lower values. To accommodate this uncertainty we relied on the fact that 141 of  
96 the 249 samples in were amplified and sequenced in duplicate (McCrone et al. 2018). We  
97 modeled the frequency-dependent variance present in the data as a beta distribution with  $\alpha =$   
98  $p * n$ ,  $\beta = p(1 - p) * n$ , where  $p$  represents the true frequency (the mean in the duplicate  
99 measurements) and  $n$  roughly represents the number of samples in a binomial distribution with  
100 probability  $p$ , and was determined with maximum likelihood optimization. We then adapted a  
101 Bayesian approach and estimated the posterior distribution of  $N_e$  integrated over all  
102 unobserved, true frequency trajectories. The analysis resulted in a marginally increased  $N_e$   
103 estimate of 50 (32-72 95% HPD, Figure 1C). The agreement between this model and our

104 previous estimates suggests that the relatively small  $N_e$  is driven by the allele trajectories  
105 themselves and is not the result of uncertainty in our frequency measurements.

106

## 107 **Discussion**

108 We have investigated the within-host dynamics of influenza in a large, well-defined cohort of  
109 representative infections and found that, under a Wright-Fisher model, the population is  
110 characterized by a small effective population size. Our findings differ from those reported in  
111 studies of immunosuppressed, chronically infected individuals, which have shown that within-  
112 host populations of influenza virus are characterized by large effective population sizes, clonal  
113 interference, and selective pressures that mimic those seen at larger biological scales (Xue et  
114 al. 2017; Lumby et al. 2020). The difference in these  $N_e$  estimates likely lies in the fundamental  
115 difference between the population dynamics of acute and chronic infections. Chronic infections,  
116 which manifest in rare immunologically atypical hosts, establish large, stable populations and  
117 may be “insulated” from the drastic fluctuation in population size that define acute cases. In the  
118 absence of any evidence for antigenic selection, it seems that evolution during the early period  
119 of influenza infections, the time frame during which transmission is most likely to occur, is best  
120 modelled as a stochastic process.

121

122 The Wright-Fisher model provides a simple framework for exploring the evolutionary dynamics  
123 of “real-world” populations. The model’s tractability comes at the cost of many simplifying  
124 assumptions (e.g. constant population size, discrete generations, homogenous mixing, neutral  
125 evolution), which are rarely, if ever, met by biological populations. Influenza viruses clearly exist  
126 as complex populations whose evolutionary dynamics are influenced by a mixture of processes  
127 not captured explicitly in the Wright-Fisher model (e.g. deleterious mutation load, migration  
128 between sites of infection, rapid population growth and decline (Lakdawala et al. 2015; Visher et  
129 al. 2016; Zhao et al. 2019)). However, the detailed, longitudinal sampling needed to fit models

130 that explicitly capture this complexity is not available for most influenza infections, which are  
131 typically short-lived and not medically attended. In the absence of such data, we have chosen a  
132 more tractable model that can yield reliable estimates of the general tendencies, rather than  
133 more complex models that may lack identifiability and generalizability.

134

135 These estimates of the effective population size and mutation rate, combined with previous  
136 estimates of the transmission bottleneck, provide a useful expectation for the shared diversity  
137 between direct transmission pairs, and can be used in conjunction with standard  
138 epidemiological models to study the forces that drive influenza evolution at a granular level.

139

## 140 **Methods**

141

### 142 *Fitting mutation rate and $N_e$*

143 The diffusion approximation to the Wright-Fisher model makes predictions regarding the allele  
144 frequency spectrum of a population given a mutation rate and  $N_e$ . Starting from a monomorphic  
145 state, while  $t \ll N_e$ , the probability of observing a mutation at frequency  $p_t$  be approximated as in  
146 equation 85 of (Rouzine et al. 2001)

147

$$148 \quad P(p_t, | t, \mu, N_e) = \frac{2\mu N_e}{p_t} e^{-\frac{2N_e p_t}{t}} \quad (1)$$

149 Where  $\mu$  is the mutation rate in substitutions/site/generation,  $N_e$  is the effective population size  
150 and  $t$  is the number of generations. Consistent with previous models of within-host influenza, we  
151 set the generation time to 6 hours (Geoghegan et al. 2016). We further assumed that infection  
152 began 1 day prior to symptom onset (Carrat et al. 2008).

153

154 To account for limitations in iSNV detection, we integrated over regions of the probability density  
155 where we have observed less than perfect sensitivity. The probability of not observing an iSNV  
156 at a locus is given by summing over the possibilities that (i) a mutation is present but below our  
157 level of detection  $P(p_t \approx 0 \mid p_t < 0.02, t, \mu, N_e)$ , and (ii) a mutation is present but missed  
158 due to low sensitivity at low frequencies  $P(p_t \approx 0 \mid 0.02 < p_t < 0.1, t, \mu, N_e)$ . In this model,  
159 we assumed there were 13,133 polymorphic loci in each sample (the number of coding sites  
160 present in the reference strain from 2014-2015). Under these assumptions,

$$\begin{aligned} 161 & \\ 162 & P(p_t \approx 0 \mid t, \mu, N_e) = \\ 163 & \quad P(p_t \approx 0 \mid p_t < 0.02, t, \mu, N_e) + \\ 164 & \quad P(p_t \approx 0, t \mid 0.02 < p_t < 0.1, t, \mu, N_e) \end{aligned} \quad (2)$$

166 Where

$$167 \quad P(p_t \approx 0 \mid p_t < 0.02, t, \mu, N_e) = \int_0^{0.02} P(p_t \mid t, \mu, N_e) dp_t \quad (3)$$

168 and

$$\begin{aligned} 169 \quad P(p_t \approx 0 \mid 0.02 < p_t < 0.1, t, \mu, N_e) &= \sum_{f_i}^{[0.02, 0.05, 0.10]} (FNR \mid Titer_r, f_i) \int_{f_i}^{f_{i+1}} P(p_t \mid \\ 170 \quad \mu, t, N_e) dp_t \end{aligned} \quad (4)$$

171  
172 Where  $(FNR \mid Titer_r, f_i)$  is the false negative rate given the frequency and the sample titer  
173 (See Supplementary File 1 in (McCrone et al. 2018)). As before, we assumed the sensitivity in  
174 the intervals between 0.02, 0.05 and 0.1 was equal to the sensitivity at the lower bound, and  
175 that the sensitivity was perfect at frequencies above 0.1. The log-likelihood of a given  $\mu$  and  $N_e$   
176 pair is then the sum of the log of equations 1 and 2 for all possible sites in the data set. The  
177 maximum-likelihood values were estimated using the bbmle package in R (Ben Bolker and  
178 Team 2020; Team 2020).



179

180 *Diffusion approximation*

181 We implemented the diffusion approximation as in (Kimura 1955), with minor modifications. As  
182 above, we included the limitations in our sensitivity to detect rare iSNV by integrating over all  
183 possible explanations for why an iSNV might not be observed at the second time point.

184

185 *Bayesian implementation of the diffusion approximation*

186 To account for measurement error in our estimates we adopted a similar approach to that  
187 developed in (Williamson and Slatkin 1999). The likelihood of observing frequencies  $\widehat{p}_0, \widehat{p}_t$  at  
188 time 0 and t given the true frequencies  $p_0$  and  $p_t$

$$P(\widehat{p}_0, \widehat{p}_t | N_e, p_0, p_t) = P(\widehat{p}_0 | p_0) P(p_t | p_0, N_e) P(\widehat{p}_t | p_t) \quad (5)$$

191 where  $P(\widehat{p}_x | p_x)$  accounts for measurement error and is defined for  $\widehat{p}_x > 0$  by the probability  
192 density at  $\widehat{p}_x$  of a beta distribution with  $\alpha = p * n$ ,  $\beta = p(1 - p) * n$  where  $n=503$  and was  
193 determined from the estimating the error in replicate sequencing samples.

194 In cases where  $\widehat{p}_x = 0$  and  $p_x > 0$ ,  $P(\widehat{p}_x | p_x)$  is the sum of the cumulative density function of the  
195 same beta distribution up to 0.02 (i.e. the variant is detected below the limit of detection) and the  
196 probability of not detecting the variant given the sample titer and false negative rate as above  
197 (the variant was not observed to imperfect sensitivity).  $P(p_t | p_0, N_e)$  is the transition probability of  
198 a variant at frequency  $p_0$  to drifting to  $p_t$  given t generations and an the effective population size  
199 of  $N_e$  as in equation 15' in (Kimura 1955). The posterior is proportional to the product of this  
200 likelihood and priors on  $N_e$ ,  $p_0$ , and  $p_t$ . We choose uniform priors for  $p_0$  and  $p_t$  and a diffuse  
201 gamma prior with shape of 0.036 and scale of 1000 (mean 36 as informed by the cross-  
202 sectional data analysis). As with the other analyses the generation time was set to 6 hours  
203 (Geoghegan et al. 2016). This approach was implemented as a plugin for BEAST and the  
204 posterior was estimated using BEAST v1.10.4 (Suchard et al. 2018). Ten independent MCMC

205 chains were run for 10 million states. Each chain was sampled every 10,000 iterations with the  
206 first 1 million states discarded as burn in. All ten chains were combined and ESS for all  
207 parameters was >200. Convergence was assessed in *TRACER* (Rambaut et al. 2018).

208

## 209 **Acknowledgments**

210 This work was supported by a Clinician Scientist Development Award from the Doris Duke  
211 Charitable Foundation (CSDA 2013105) and R01 AI118886 to ASL. The HIVE cohort was  
212 supported by NIH R01 AI097150 and CDC U01 IP00474 to ASM. JTM was supported by the  
213 Michigan Predoctoral Training Program in Genetics (T32GM007544). RJW was supported by  
214 K08AI119182. We thank Alexey Kondrashov and Aaron King for helpful discussion.

215

## 216 **Data availability**

217 All raw sequence data have been deposited at the NCBI sequence read archive (BioProject  
218 Accession number PRJNA412631) as described in (McCrone et al. 2018). Variants were called  
219 following the validated protocol outlined in (McCrone and Lauring 2016) with details provided in  
220 (McCrone et al. 2018). Called variants and the scripts needed to reproduce this analysis are  
221 publicly available at [https://github.com/lauringlab/IAV\\_within-host\\_Ne](https://github.com/lauringlab/IAV_within-host_Ne)

222

## 223 **References**

224 Bedford T, Riley S, Barr IG, Broor S, Chadha M, Cox NJ, Daniels RS, Gunasekaran CP, Hurt  
225 AC, Kelso A, et al. 2015. Global circulation patterns of seasonal influenza viruses vary with  
226 antigenic drift. *Nature* 523:217–220.

227 Bedford T, Suchard MA, Lemey P, Dudas G, Gregory V, Hay AJ, McCauley JW, Russell CA,  
228 Smith DJ, Rambaut A. 2014. Integrating influenza antigenic dynamics with molecular  
229 evolution. *eLife* [Internet] 3:e01914–e01926. Available from:  
230 <http://elifesciences.org/lookup/doi/10.7554/eLife.01914>

231 Ben Bolker, Team RDC. 2020. *bbmle: Tools for General Maximum Likelihood Estimation*.

- 232 Available from: <https://CRAN.R-project.org/package=bbmle>
- 233 Carrat F, Vergu E, Ferguson NM, Lemaître M, Cauchemez S, Leach S, Valleron A-J. 2008. Time  
234 Lines of Infection and Disease in Human Influenza: A Review of Volunteer Challenge  
235 Studies. *Am J Epidemiol* 167:775–785.
- 236 De Maio N, Worby CJ, Wilson DJ, Stoesser N. 2018. Bayesian reconstruction of transmission  
237 within outbreaks using genomic variants. Koelle K, editor. *PLoS Comput Biol* 14:e1006117–  
238 e1006123.
- 239 Debbink K, McCrone JT, Petrie JG, Truscon R, Johnson E, Mantlo EK, Monto AS, Lauring AS.  
240 2017. Vaccination has minimal impact on the intrahost diversity of H3N2 influenza  
241 viruses. Perez DR, editor. *PLoS Pathog* 13:e1006194.
- 242 Didelot X, Fraser C, Gardy J, Colijn C. 2017. Genomic infectious disease epidemiology in  
243 partially sampled and ongoing outbreaks. *Molecular Biology and Evolution*:msw075–11.
- 244 Didelot X, Gardy J, Colijn C. 2014. Bayesian Inference of Infectious Disease Transmission from  
245 Whole-Genome Sequence Data. *Molecular Biology and Evolution* 31:1869–1879.
- 246 Geoghegan JL, Senior AM, Holmes EC. 2016. Pathogen population bottlenecks and adaptive  
247 landscapes: overcoming the barriers to disease emergence. *Proc. Biol. Sci.*  
248 283:20160727–20160729.
- 249 Hall M, Woolhouse M, Rambaut A. 2015. Epidemic Reconstruction in a Phylogenetics  
250 Framework: Transmission Trees as Partitions of the Node Set. Salathé M, editor. *PLoS*  
251 *Comput Biol* 11:e1004613–e1004636.
- 252 Kimura M. 1955. SOLUTION OF A PROCESS OF RANDOM GENETIC DRIFT WITH A  
253 CONTINUOUS MODEL. *Proceedings of the National Academy of Sciences* 41:144–150.
- 254 Lakdawala SS, Jayaraman A, Halpin RA, Lamirande EW, Shih AR, Stockwell TB, Lin X,  
255 Simenauer A, Hanson CT, Vogel L, et al. 2015. The soft palate is an important site of  
256 adaptation for transmissible influenza viruses. *Nature* 526:122–125.
- 257 Lemey P, Suchard M, Rambaut A. 2009. Reconstructing the initial global spread of a human  
258 influenza pandemic: A Bayesian spatial-temporal model for the global spread of H1N1pdm.  
259 *PLoS Curr* 1:RRN1031.
- 260 Lumby CK, Zhao L, Breuer J, Illingworth CJR. 2020. A large effective population size for  
261 established within-host influenza virus infection. *eLife* 9:217.
- 262 McCrone JT, Lauring AS. 2016. Measurements of intrahost viral diversity are extremely  
263 sensitive to systematic errors in variant calling. *J. Virol.* 90:JVI.00667–16–6895.
- 264 McCrone JT, Woods RJ, Martin ET, Malosh RE, Monto AS, Lauring AS. 2018. Stochastic  
265 processes constrain the within and between host evolution of influenza virus. *eLife* 7:24.
- 266 Rambaut A, Drummond AJ, Xie D, Baele G, Suchard MA. 2018. Posterior Summarization in  
267 Bayesian Phylogenetics Using Tracer 1.7. Susko E, editor. *Systematic Biology* 67:901–904.

- 268 Rouzine IM, Rodrigo A, Coffin JM. 2001. Transition between stochastic evolution and  
269 deterministic evolution in the presence of selection: general theory and application to  
270 virology. *Microbiology and Molecular Biology Reviews* 65:151–185.
- 271 Sanjuán R, Nebot MR, Chirico N, Mansky LM, Belshaw R. 2010. Viral mutation rates. *J. Virol.*  
272 84:9733–9748.
- 273 Sobel Leonard A, McClain MT, Smith GJD, Wentworth DE, Halpin RA, Lin X, Ransier A,  
274 Stockwell TB, Das SR, Gilbert AS, et al. 2017. The effective rate of influenza reassortment  
275 is limited during human infection. *PLoS Pathog* 13:e1006203.
- 276 Suchard MA, Lemey P, Baele G, Ayres DL, Drummond AJ, Rambaut A. 2018. Bayesian  
277 phylogenetic and phylodynamic data integration using BEAST 1.10. *Virus Evol* 4:170.
- 278 Team RC. 2020. R: A Language and Environment for Statistical Computing. Available from:  
279 <https://www.R-project.org/>
- 280 Visher E, Whitefield SE, McCrone JT, Fitzsimmons W, Lauring AS. 2016. The Mutational  
281 Robustness of Influenza A Virus. Ferguson NM, editor. *PLoS Pathog* 12:e1005856.
- 282 Williamson EG, Slatkin M. 1999. Using maximum likelihood to estimate population size from  
283 temporal changes in allele frequencies. *Genetics* 152:755–761.
- 284 Xue KS, Stevens-Ayers T, Campbell AP, Englund JA, Pergam SA, Boeckh M, Bloom JD. 2017.  
285 Parallel evolution of influenza across multiple spatiotemporal scales. *eLife* 6:46.
- 286 Zhao L, Abbasi AB, Illingworth CJR. 2019. Mutational load causes stochastic evolutionary  
287 outcomes in acute RNA viral infection. *Virus Evol* 5:686–12.
- 288
- 289

290 **Figure 1.** (A) Joint estimate of within-host mutation rate and effective population size. Contour  
291 plot shows the log likelihood surface for estimates of the effective population size and neutral  
292 mutation rate. The point represents the peak ( $\mu = 3.4 \times 10^{-6}$ ,  $N_e = 36$ ). Log likelihoods for each  
293 contour are indicated. (B) The distribution of  $N_e$  estimated in 500 subsamples of the data in  
294 which one iSNV was taken per individual. The bimodality of the distribution reflects a slight  
295 sensitivity to the inclusion of a few specific iSNV. (C) The posterior and prior probability  
296 densities for  $N_e$  over all values explored in the in the combined MCMC chains (22-93). The 95%  
297 HPD of the posterior (32-72) is shaded blue.

298

299 **Table 1. Within host effective population size of IAV**

300

| iSNV Used     | Generation Time (h) | Effective Population Size (95% CI) |
|---------------|---------------------|------------------------------------|
| All           | 6                   | 34 (25-46)                         |
| All           | 12                  | 17 (13-23)                         |
| Nonsynonymous | 6                   | 27 (16-44)                         |
| Synonymous    | 6                   | 40 (27-59)                         |
| All           | 12                  | 17 (13-23)                         |
| Nonsynonymous | 12                  | 14 (8-22)                          |
| Synonymous    | 12                  | 20 (14-29)                         |

301

Figure 1

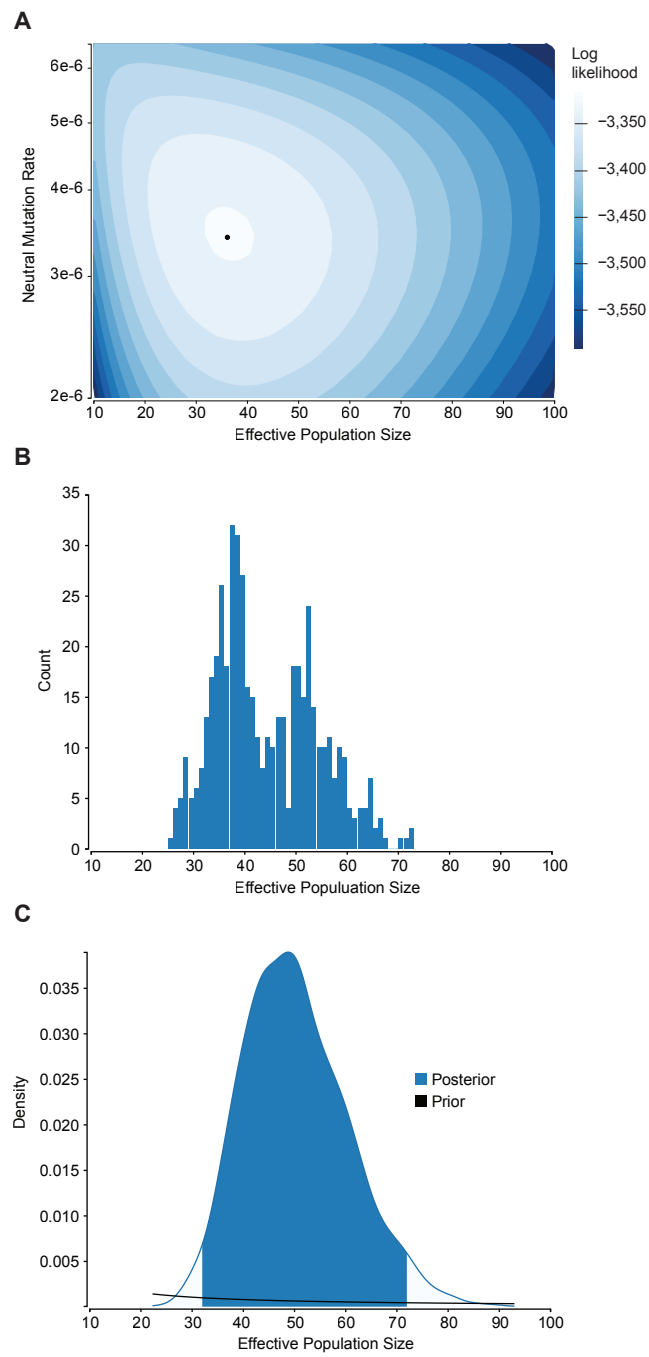

Source: https://www.biorxiv.org/content/10.1101/2020.10.24.353748v1.full.pdf
